# Supplementary material
Source: PubMed Central journal article supplement (PMC2098785)
Supplement: pgen.0030185.st012.pdf [file pgen.0030185.st012.pdf]

**Table S12.** Correlation of heterozygosity with distance from the Bering Strait when excluding populations with the highest level of European admixture.

| <b>Population</b> | <b>Estimated European admixture</b> | <b>Correlation coefficient of heterozygosity with distance from the Bering Strait</b> |
|-------------------|-------------------------------------|---------------------------------------------------------------------------------------|
| Cree              | 0.2422                              | -0.368                                                                                |
| Arhuaco           | 0.1844                              | -0.368                                                                                |
| Ojibwa            | 0.1822                              | -0.317                                                                                |
| Huilliche         | 0.1640                              | -0.423                                                                                |
| Wayuu             | 0.1236                              | -0.434                                                                                |
| Kaingang          | 0.0979                              | -0.473                                                                                |
| Quechua           | 0.0932                              | -0.541                                                                                |
| Inga              | 0.0871                              | -0.551                                                                                |
| Maya              | 0.0828                              | -0.530                                                                                |
| Guarani           | 0.0827                              | -0.645                                                                                |

The correlation coefficient on a given row is obtained when excluding from the computation all populations on that row or above it. Populations are sorted in decreasing order of European admixture, estimates of which were obtained from the values plotted in Figure 6.
