# Supplementary material
Source: PubMed Central journal article supplement (PMC2098785)
Supplement: pgen.0030185.st014.pdf [file pgen.0030185.st014.pdf]

**Table S14.** Inferred relative pairs within populations (part II).

| Population | Inferred relative pairs                                                                                                                                                                                                                                                                                                                                            | Comments                                                                                                                                                                                                                                                                                                                                                                                                                                                                                                                                                                                                                 | Individuals excluded from N379       | Individuals excluded from N354                                                                   |
|------------|--------------------------------------------------------------------------------------------------------------------------------------------------------------------------------------------------------------------------------------------------------------------------------------------------------------------------------------------------------------------|--------------------------------------------------------------------------------------------------------------------------------------------------------------------------------------------------------------------------------------------------------------------------------------------------------------------------------------------------------------------------------------------------------------------------------------------------------------------------------------------------------------------------------------------------------------------------------------------------------------------------|--------------------------------------|--------------------------------------------------------------------------------------------------|
| Chipewyan  | (2394, 2395) FS<br>(2390, 2395) GG, HS, CO, or AV<br>(2390, 2474) HS, AV, CO, or GG<br>(2392, 2399) PO<br>(2392, 2400) PO<br>(2399, 2400) FS<br>(2383, 2560) FS<br>(2156, 2560) HS, AV, or GG<br>(2156, 2383) AV or HS<br>(2383, 2398) GG, CO, or HS<br>(2012, 2387) GG, HS, or AV<br>(2382, 2393) GG or HS<br>(2455, 2800) GG or HS<br>(2511, 2515) AV, HS, or CO | No other non-cousin relationships involving 2390, 2394, 2395, 2474.<br><br>It is likely that 2392 (m) is the parent of 2399 (m) and 2400 (m). No other non-cousin relationships involving 2392, 2399, 2400.<br><br>No other non-cousin relationships involving 2156, 2383, 2398, 2560.<br><br>No other non-cousin relationships involving 2012, 2387.<br>No other non-cousin relationships involving 2382, 2393.<br>No other non-cousin relationships involving 2455, 2800.<br>No other non-cousin relationships involving 2511, 2515.<br>This population has 20 inferred cousin relationships involving 22 individuals. | 2395<br><br>2399<br>2400<br><br>2560 | 2395<br>2390<br><br>2399<br>2400<br><br>2560<br><br>2156<br>2383<br>2387<br>2393<br>2800<br>2515 |
| Cree       | (2411, 2418) FS                                                                                                                                                                                                                                                                                                                                                    | No other relationships involving 2411, 2418.<br>(2410, 2417) are inferred to be cousins.<br>No other relationships in this population                                                                                                                                                                                                                                                                                                                                                                                                                                                                                    | 2418                                 | 2418                                                                                             |
| Embera     | (2569, 2570) PO<br>(2564, 2565) FS<br>(2564, 2566) FS<br>(2565, 2566) FS<br>(2561, 2562) AV, HS, or GG                                                                                                                                                                                                                                                             | No other relationships involving 2569, 2570.<br>No other relationships involving 2564, 2565, 2566.<br><br>This pair had a low level of loci with 0 alleles shared identical by state, so it is possible that it is a parent/offspring pair with a high number of genotyping errors. No other relationships involving 2561, 2562.<br>(2568, 2574) are inferred to be cousins.<br>No other relationships in this population.                                                                                                                                                                                               | 2569<br>2564<br>2566<br><br>2562     | 2569<br>2564<br>2566<br><br>2562                                                                 |
| Guarani    | (2729, 2731) PO or GG<br><br>(2725, 2726) FS                                                                                                                                                                                                                                                                                                                       | (2728, 2729) are inferred to be cousins. No other relationships involving 2728, 2729, 2731.<br>No other relationships involving 2725, 2726.<br>No other relationships in this population.                                                                                                                                                                                                                                                                                                                                                                                                                                | 2729<br><br>2726                     | 2729<br><br>2726                                                                                 |
