# Supplementary material
Source: PubMed Central journal article supplement (PMC2098785)
Supplement: pgen.0030185.st015.pdf [file pgen.0030185.st015.pdf]

**Table S15.** Inferred relative pairs within populations (part III).

| Population | Inferred relative pairs                                                                                                                                                                                                                                                                                                               | Comments                                                                                                                                                                                                                                                                                                                                                                                                                                                                                                                                                                                        | Individuals excluded from N379                                           | Individuals excluded from N354                                               |
|------------|---------------------------------------------------------------------------------------------------------------------------------------------------------------------------------------------------------------------------------------------------------------------------------------------------------------------------------------|-------------------------------------------------------------------------------------------------------------------------------------------------------------------------------------------------------------------------------------------------------------------------------------------------------------------------------------------------------------------------------------------------------------------------------------------------------------------------------------------------------------------------------------------------------------------------------------------------|--------------------------------------------------------------------------|------------------------------------------------------------------------------|
| Guaymi     | (2011, 2014) HS, AV, or GG<br><br>(2002, 2013) AV, HS, or CO                                                                                                                                                                                                                                                                          | (2014, 2018) are inferred to be cousins. No other relationships involving 2011, 2014, 2018.<br>(2002, 2017) are inferred to be cousins. No other relationships involving 2002, 2013, 2017.<br>(2004, 2009), (2004, 2019), (2009, 2019) are inferred to be cousins.<br>No other relationships in this population.                                                                                                                                                                                                                                                                                |                                                                          | 2014<br><br>2002                                                             |
| Huilliche  |                                                                                                                                                                                                                                                                                                                                       | No relationships in this population.                                                                                                                                                                                                                                                                                                                                                                                                                                                                                                                                                            |                                                                          |                                                                              |
| Inga       | (2517, 2518) PO<br>(2501, 2505) HS, AV, or GG                                                                                                                                                                                                                                                                                         | No other relationships involving 2517, 2518.<br>(2503, 2505), (2501, 2503) are inferred to be cousins.<br>No other relationships in this population.                                                                                                                                                                                                                                                                                                                                                                                                                                            | 2518                                                                     | 2518<br>2505                                                                 |
| Kaingang   |                                                                                                                                                                                                                                                                                                                                       | No relationships in this population.                                                                                                                                                                                                                                                                                                                                                                                                                                                                                                                                                            |                                                                          |                                                                              |
| Kaqchikel  | (2690, 2694) FS                                                                                                                                                                                                                                                                                                                       | No other relationships in this population.                                                                                                                                                                                                                                                                                                                                                                                                                                                                                                                                                      | 2690                                                                     | 2690                                                                         |
| Kogi       | (2466, 2467) FS<br>(2466, 2476) PO<br>(2467, 2476) PO<br>(2470, 2476) FS<br>(2461, 2473) PO<br>(2462, 2473) PO<br>(2464, 2473) PO<br>(2473, 2475) PO<br>(2461, 2462) FS<br>(2461, 2464) FS<br>(2461, 2475) FS<br>(2462, 2464) FS<br>(2462, 2475) FS<br>(2464, 2475) FS<br>(2468, 2473) FS<br>(2472, 2473) GG or CO<br>(2465, 2472) PO | It is likely that 2476 (f) is the parent of 2466 (m) and 2467 (f). (2466, 2470), (2467, 2470) are inferred to be cousins. No other relationships involving 2466, 2467, 2470, 2476.<br><br>It is likely that 2473 (m) is the parent of 2461 (m), 2462 (m), 2464 (m), and 2475 (f).<br><br>It is strange that (2468, 2473) are full sibs but no relationships are observed with 2468 and 2461, 2462, 2464, or 2475. (2465, 2480) are inferred to be cousins. No other relationships involving 2461, 2462, 2464, 2465, 2468, 2472, 2473, 2475, 2480.<br>No other relationships in this population. | 2467<br>2476<br><br><br>2461<br>2462<br>2464<br>2475<br><br>2473<br>2472 | 2467<br>2476<br>2466<br><br>2461<br>2462<br>2464<br>2475<br><br>2473<br>2472 |
| Mixe       |                                                                                                                                                                                                                                                                                                                                       | (2069, 2073) are inferred to be cousins.<br>No other relationships in this population.                                                                                                                                                                                                                                                                                                                                                                                                                                                                                                          |                                                                          |                                                                              |
| Mixtec     | (2051, 2055) FS<br>(2052, 2054) GG                                                                                                                                                                                                                                                                                                    | No other relationships involving 2051, 2055.<br>This pair had a low level of loci with 0 alleles shared identical by state, so it is possible that it is a parent/offspring pair with a high number of genotyping errors. No other relationships involving 2052, 2054.<br>No other relationships in this population.                                                                                                                                                                                                                                                                            | 2055<br>2054                                                             | 2055<br>2054                                                                 |
