# Supplementary material
Source: PubMed Central journal article supplement (PMC2098785)
Supplement: pgen.0030185.st017.pdf [file pgen.0030185.st017.pdf]

**Table S17.** Inferred relative pairs within populations (part V).

| <b>Population</b> | <b>Inferred relative pairs</b> | <b>Comments</b>                                                                                                                                                                                                                                                                                                                                                                                                                                                                                                                                                   | <b>Individuals excluded from N379</b> | <b>Individuals excluded from N354</b> |
|-------------------|--------------------------------|-------------------------------------------------------------------------------------------------------------------------------------------------------------------------------------------------------------------------------------------------------------------------------------------------------------------------------------------------------------------------------------------------------------------------------------------------------------------------------------------------------------------------------------------------------------------|---------------------------------------|---------------------------------------|
| <b>Waunana</b>    | (2581, 2584) PO                | (2581, 2583) are inferred to be cousins, half sibs, or avuncular. No other relationships involving 2581, 2583, 2584.                                                                                                                                                                                                                                                                                                                                                                                                                                              | 2584                                  | 2584                                  |
|                   | (2583, 2584) HS, AV, or GG     |                                                                                                                                                                                                                                                                                                                                                                                                                                                                                                                                                                   | 2597                                  | 2597                                  |
|                   | (2595, 2597) PO                |                                                                                                                                                                                                                                                                                                                                                                                                                                                                                                                                                                   |                                       |                                       |
|                   | (2596, 2597) PO                |                                                                                                                                                                                                                                                                                                                                                                                                                                                                                                                                                                   |                                       |                                       |
|                   | (2585, 2589) PO                |                                                                                                                                                                                                                                                                                                                                                                                                                                                                                                                                                                   | 2585                                  | 2585                                  |
|                   | (2585, 2590) PO                |                                                                                                                                                                                                                                                                                                                                                                                                                                                                                                                                                                   | 2590                                  | 2590                                  |
|                   | (2586, 2589) PO                | It is likely that 2589 (f) and 2590 (m) are the parents of 2585 (m), 2586 (m), 2587 (f), and 2588 (m).                                                                                                                                                                                                                                                                                                                                                                                                                                                            | 2586                                  | 2586                                  |
|                   | (2586, 2590) PO                |                                                                                                                                                                                                                                                                                                                                                                                                                                                                                                                                                                   |                                       |                                       |
|                   | (2587, 2589) PO                |                                                                                                                                                                                                                                                                                                                                                                                                                                                                                                                                                                   | 2587                                  | 2587                                  |
|                   | (2587, 2590) PO                |                                                                                                                                                                                                                                                                                                                                                                                                                                                                                                                                                                   |                                       |                                       |
|                   | (2588, 2589) PO                |                                                                                                                                                                                                                                                                                                                                                                                                                                                                                                                                                                   | 2588                                  | 2588                                  |
|                   | (2588, 2590) PO                |                                                                                                                                                                                                                                                                                                                                                                                                                                                                                                                                                                   |                                       |                                       |
|                   | (2585, 2586) FS                | (2590, 2600) are inferred to be cousins. (2585, 2599) are inferred to be cousins or grandparent/grandchild, (2586, 2599) are inferred to be cousins, (2587, 2599) are inferred to be cousins or grandparent/grandchild, (2588, 2599) are inferred to be cousins. (2589, 2598) are inferred to be cousins. It is likely that 2598 (m) and 2599 (f) are the parents of 2600 (f), and that 2599 (f) is the sibling of 2590 (m). No other relationships involving 2585, 2586, 2587, 2588, 2589, 2590, 2598, 2599, 2600.<br>No other relationships in this population. |                                       |                                       |
|                   | (2585, 2587) FS                |                                                                                                                                                                                                                                                                                                                                                                                                                                                                                                                                                                   |                                       |                                       |
|                   | (2585, 2588) FS                |                                                                                                                                                                                                                                                                                                                                                                                                                                                                                                                                                                   |                                       |                                       |
|                   | (2586, 2587) FS                |                                                                                                                                                                                                                                                                                                                                                                                                                                                                                                                                                                   |                                       |                                       |
|                   | (2586, 2588) FS                |                                                                                                                                                                                                                                                                                                                                                                                                                                                                                                                                                                   |                                       |                                       |
|                   | (2587, 2588) FS                |                                                                                                                                                                                                                                                                                                                                                                                                                                                                                                                                                                   |                                       |                                       |
|                   | (2590, 2599) FS                |                                                                                                                                                                                                                                                                                                                                                                                                                                                                                                                                                                   |                                       | 2599                                  |
|                   | (2599, 2600) PO                |                                                                                                                                                                                                                                                                                                                                                                                                                                                                                                                                                                   | 2600                                  | 2600                                  |
|                   | (2598, 2600) PO                |                                                                                                                                                                                                                                                                                                                                                                                                                                                                                                                                                                   |                                       |                                       |
| <b>Wayuu</b>      | (2525, 2538) FS                | No other relationships involving 2525, 2538.                                                                                                                                                                                                                                                                                                                                                                                                                                                                                                                      | 2525                                  | 2525                                  |
|                   | (2539, 2540) FS                | No other relationships involving 2539, 2540.<br>No other relationships in this population                                                                                                                                                                                                                                                                                                                                                                                                                                                                         | 2539                                  | 2539                                  |
| <b>Zapotec</b>    |                                | No relationships in this population.                                                                                                                                                                                                                                                                                                                                                                                                                                                                                                                              |                                       |                                       |
| <b>Zenu</b>       | (2485, 2486) FS                | No other relationships involving 2485, 2486, 2487.                                                                                                                                                                                                                                                                                                                                                                                                                                                                                                                | 2485                                  | 2485                                  |
|                   | (2485, 2487) FS                |                                                                                                                                                                                                                                                                                                                                                                                                                                                                                                                                                                   | 2487                                  | 2487                                  |
|                   | (2486, 2487) FS                |                                                                                                                                                                                                                                                                                                                                                                                                                                                                                                                                                                   |                                       |                                       |
|                   | (2493, 2494) AV, HS, or CO     | No other relationships involving 2493, 2494.                                                                                                                                                                                                                                                                                                                                                                                                                                                                                                                      |                                       | 2494                                  |
|                   | (2499, 2500) AV or HS          | No other relationships involving 2499, 2500.                                                                                                                                                                                                                                                                                                                                                                                                                                                                                                                      |                                       | 2499                                  |
|                   | (2483, 2496) GG                | (2495, 2496), (2496, 2497), (2495, 2497), (2488, 2495), (2488, 2497) are inferred to be cousins.<br>No other relationships in this population.                                                                                                                                                                                                                                                                                                                                                                                                                    |                                       | 2496                                  |
