# Supplementary material
Source: PubMed Central journal article supplement (PMC2098785)
Supplement: pgen.0030185.st029.pdf [file pgen.0030185.st029.pdf]

**Table S29.** Chord genetic distance matrix for Native American populations.

|        |                   |          |          |          |          |          |          |          |          |          |          |          |          |          |          |          |          |          |          |          |          |          |          |          |          |          |          |          |          |          |
|--------|-------------------|----------|----------|----------|----------|----------|----------|----------|----------|----------|----------|----------|----------|----------|----------|----------|----------|----------|----------|----------|----------|----------|----------|----------|----------|----------|----------|----------|----------|----------|
| I      | Chipewyan         | 0.000000 | 0.264029 | 0.268400 | 0.349163 | 0.306662 | 0.291177 | 0.311256 | 0.267961 | 0.307346 | 0.329019 | 0.379549 | 0.386892 | 0.365707 | 0.346167 | 0.369181 | 0.319696 | 0.312994 | 0.273313 | 0.290884 | 0.288407 | 0.405066 | 0.344409 | 0.293258 | 0.362392 | 0.372962 | 0.375486 | 0.387429 | 0.449473 | 0.463971 |
| II     | Cree              | 0.264029 | 0.000000 | 0.243889 | 0.337766 | 0.290914 | 0.276371 | 0.292068 | 0.248119 | 0.297167 | 0.318264 | 0.362202 | 0.381925 | 0.351826 | 0.331989 | 0.356151 | 0.308553 | 0.301853 | 0.256502 | 0.272707 | 0.274097 | 0.395926 | 0.329342 | 0.283287 | 0.352266 | 0.361717 | 0.362794 | 0.377724 | 0.435561 | 0.449299 |
| III    | Ojibwa            | 0.268400 | 0.243889 | 0.000000 | 0.340361 | 0.293115 | 0.279024 | 0.295282 | 0.250089 | 0.292944 | 0.315688 | 0.359156 | 0.379818 | 0.349617 | 0.330912 | 0.357056 | 0.302595 | 0.300217 | 0.260587 | 0.279424 | 0.276007 | 0.395788 | 0.334695 | 0.282643 | 0.350782 | 0.366810 | 0.366422 | 0.380778 | 0.438452 | 0.454149 |
| IV     | Pima              | 0.349163 | 0.337766 | 0.340361 | 0.000000 | 0.336324 | 0.319966 | 0.336341 | 0.300325 | 0.336503 | 0.362591 | 0.409727 | 0.412786 | 0.410352 | 0.380350 | 0.407357 | 0.352473 | 0.351196 | 0.308988 | 0.320504 | 0.328970 | 0.454011 | 0.390018 | 0.336183 | 0.396505 | 0.411627 | 0.413295 | 0.429771 | 0.483965 | 0.518751 |
| V      | Mixtec            | 0.306662 | 0.290914 | 0.293115 | 0.336324 | 0.000000 | 0.259214 | 0.263917 | 0.244802 | 0.277835 | 0.305515 | 0.352410 | 0.366564 | 0.351666 | 0.325963 | 0.352296 | 0.295450 | 0.293917 | 0.254917 | 0.265491 | 0.273890 | 0.398292 | 0.332681 | 0.277710 | 0.341571 | 0.354442 | 0.351313 | 0.370243 | 0.432551 | 0.449224 |
| VI     | Zapotec           | 0.291177 | 0.276371 | 0.279024 | 0.319966 | 0.259214 | 0.000000 | 0.259664 | 0.232222 | 0.264070 | 0.296429 | 0.341473 | 0.355306 | 0.343680 | 0.317016 | 0.340847 | 0.283797 | 0.279516 | 0.242544 | 0.253304 | 0.258605 | 0.383710 | 0.319171 | 0.265193 | 0.332072 | 0.343913 | 0.343041 | 0.359888 | 0.423803 | 0.433963 |
| VII    | Mixe              | 0.311256 | 0.292068 | 0.295282 | 0.336341 | 0.263917 | 0.259664 | 0.000000 | 0.243096 | 0.277194 | 0.308464 | 0.349020 | 0.364933 | 0.357340 | 0.323237 | 0.356123 | 0.293639 | 0.292600 | 0.249688 | 0.263384 | 0.273395 | 0.400887 | 0.331936 | 0.279940 | 0.345775 | 0.350277 | 0.354629 | 0.370374 | 0.435776 | 0.456217 |
| VIII   | Maya              | 0.267961 | 0.248119 | 0.250089 | 0.300325 | 0.244802 | 0.232222 | 0.243096 | 0.000000 | 0.237706 | 0.272384 | 0.313098 | 0.330997 | 0.317230 | 0.288771 | 0.314862 | 0.259586 | 0.256375 | 0.210464 | 0.225082 | 0.236089 | 0.358698 | 0.293543 | 0.243457 | 0.304312 | 0.319591 | 0.322626 | 0.331653 | 0.393129 | 0.411142 |
| IX     | Kaqchikel         | 0.307346 | 0.297167 | 0.292944 | 0.336503 | 0.277835 | 0.264070 | 0.277194 | 0.237706 | 0.000000 | 0.300499 | 0.345284 | 0.364713 | 0.352089 | 0.322376 | 0.353080 | 0.292355 | 0.286726 | 0.244757 | 0.259720 | 0.271535 | 0.403854 | 0.328760 | 0.278584 | 0.340012 | 0.350506 | 0.355272 | 0.372884 | 0.438520 | 0.451801 |
| X      | Cabecar           | 0.329019 | 0.318264 | 0.315688 | 0.362591 | 0.305515 | 0.296429 | 0.308464 | 0.272384 | 0.300499 | 0.000000 | 0.314610 | 0.362615 | 0.355619 | 0.322626 | 0.350423 | 0.302154 | 0.314833 | 0.279862 | 0.289461 | 0.297304 | 0.418149 | 0.349480 | 0.289453 | 0.363012 | 0.375809 | 0.379440 | 0.386069 | 0.448703 | 0.471200 |
| XI     | Guaymi            | 0.379549 | 0.362202 | 0.359156 | 0.409727 | 0.352410 | 0.341473 | 0.349020 | 0.313098 | 0.345284 | 0.314610 | 0.000000 | 0.398843 | 0.404030 | 0.367288 | 0.403406 | 0.346237 | 0.359974 | 0.322602 | 0.335396 | 0.338754 | 0.461883 | 0.397633 | 0.334522 | 0.410903 | 0.418425 | 0.419929 | 0.431388 | 0.497778 | 0.516400 |
| XII    | Kogi              | 0.386892 | 0.381925 | 0.379818 | 0.421786 | 0.366564 | 0.355306 | 0.364933 | 0.330997 | 0.364713 | 0.362615 | 0.398843 | 0.000000 | 0.380760 | 0.393086 | 0.424009 | 0.368520 | 0.378214 | 0.340574 | 0.352210 | 0.359832 | 0.474168 | 0.415133 | 0.350499 | 0.422282 | 0.428224 | 0.427312 | 0.441104 | 0.519001 | 0.534395 |
| XIII   | Arhuaco           | 0.365707 | 0.351826 | 0.349617 | 0.410352 | 0.351666 | 0.343680 | 0.357340 | 0.317230 | 0.352089 | 0.355619 | 0.404030 | 0.380760 | 0.000000 | 0.382634 | 0.418223 | 0.354474 | 0.359460 | 0.323726 | 0.337880 | 0.342579 | 0.465587 | 0.401520 | 0.332364 | 0.412186 | 0.414616 | 0.419837 | 0.433542 | 0.497416 | 0.520697 |
| XIV    | Waunana           | 0.346167 | 0.331989 | 0.330912 | 0.380350 | 0.325963 | 0.317016 | 0.323237 | 0.288771 | 0.322376 | 0.322626 | 0.367288 | 0.393086 | 0.382634 | 0.000000 | 0.366829 | 0.327955 | 0.329398 | 0.291810 | 0.302232 | 0.311442 | 0.435447 | 0.367689 | 0.310936 | 0.377172 | 0.387890 | 0.392572 | 0.404396 | 0.465948 | 0.482561 |
| XV     | Embera            | 0.369181 | 0.356151 | 0.357056 | 0.407357 | 0.352296 | 0.340847 | 0.356123 | 0.314862 | 0.353080 | 0.350423 | 0.403406 | 0.424009 | 0.418223 | 0.366829 | 0.000000 | 0.354069 | 0.356392 | 0.322135 | 0.335747 | 0.336055 | 0.462017 | 0.402070 | 0.340018 | 0.410211 | 0.414400 | 0.419926 | 0.432710 | 0.506379 | 0.521164 |
| XVI    | Zenu              | 0.319696 | 0.308553 | 0.302595 | 0.352473 | 0.295450 | 0.283797 | 0.293639 | 0.259586 | 0.292355 | 0.302154 | 0.346237 | 0.368520 | 0.354474 | 0.327955 | 0.354069 | 0.000000 | 0.301735 | 0.263306 | 0.278419 | 0.284106 | 0.406342 | 0.342734 | 0.280723 | 0.350688 | 0.364985 | 0.368143 | 0.376516 | 0.444677 | 0.456491 |
| XVII   | Inga              | 0.312994 | 0.301853 | 0.300217 | 0.351196 | 0.293917 | 0.279516 | 0.292600 | 0.256375 | 0.286726 | 0.314833 | 0.359974 | 0.378214 | 0.359460 | 0.329398 | 0.356392 | 0.301735 | 0.000000 | 0.251691 | 0.268650 | 0.280939 | 0.405453 | 0.330883 | 0.284280 | 0.343765 | 0.345567 | 0.356558 | 0.372360 | 0.437429 | 0.448231 |
| XVIII  | Quechua           | 0.273313 | 0.256502 | 0.260587 | 0.308988 | 0.254917 | 0.242544 | 0.249688 | 0.210464 | 0.244757 | 0.279862 | 0.322602 | 0.340574 | 0.323726 | 0.291810 | 0.322135 | 0.263306 | 0.251691 | 0.000000 | 0.211004 | 0.237664 | 0.366413 | 0.292600 | 0.247685 | 0.306821 | 0.311275 | 0.318874 | 0.335672 | 0.397055 | 0.411499 |
| XIX    | Aymara            | 0.290884 | 0.277207 | 0.279424 | 0.320504 | 0.265491 | 0.253304 | 0.263384 | 0.225082 | 0.259720 | 0.289461 | 0.335396 | 0.352210 | 0.337880 | 0.302232 | 0.335747 | 0.278419 | 0.268650 | 0.211004 | 0.000000 | 0.251663 | 0.383081 | 0.313257 | 0.261955 | 0.323139 | 0.332527 | 0.335417 | 0.354820 | 0.412453 | 0.435380 |
| XX     | Huilliche         | 0.288407 | 0.274097 | 0.276007 | 0.328970 | 0.273890 | 0.258605 | 0.273395 | 0.236089 | 0.271535 | 0.297304 | 0.338754 | 0.359832 | 0.342579 | 0.311442 | 0.336055 | 0.284106 | 0.280939 | 0.237664 | 0.251663 | 0.000000 | 0.376683 | 0.314779 | 0.264709 | 0.328917 | 0.341894 | 0.343111 | 0.353114 | 0.417608 | 0.424928 |
| XXI    | Kaingang          | 0.405066 | 0.395926 | 0.395788 | 0.454011 | 0.398292 | 0.383710 | 0.400887 | 0.358698 | 0.403854 | 0.418149 | 0.461883 | 0.474168 | 0.465587 | 0.435447 | 0.462017 | 0.406342 | 0.405453 | 0.366413 | 0.383081 | 0.376683 | 0.000000 | 0.437516 | 0.380001 | 0.449775 | 0.453453 | 0.465205 | 0.474305 | 0.550770 | 0.559834 |
| XXII   | Guarani           | 0.344409 | 0.329342 | 0.334695 | 0.390018 | 0.332681 | 0.319171 | 0.331936 | 0.293543 | 0.328760 | 0.349480 | 0.397633 | 0.415133 | 0.401520 | 0.367689 | 0.402070 | 0.342734 | 0.330883 | 0.292600 | 0.313257 | 0.314779 | 0.437516 | 0.000000 | 0.321324 | 0.383083 | 0.396139 | 0.394599 | 0.405379 | 0.469253 | 0.483333 |
| XXIII  | Wayuu             | 0.293258 | 0.283287 | 0.282643 | 0.336183 | 0.277710 | 0.265193 | 0.279940 | 0.243457 | 0.278584 | 0.289453 | 0.334522 | 0.350499 | 0.332364 | 0.310936 | 0.340018 | 0.280723 | 0.284280 | 0.247685 | 0.261955 | 0.264709 | 0.380001 | 0.321324 | 0.000000 | 0.334547 | 0.340346 | 0.348238 | 0.360987 | 0.424873 | 0.437212 |
| XXIV   | Piapoco           | 0.362392 | 0.352266 | 0.350782 | 0.396505 | 0.341571 | 0.332072 | 0.345775 | 0.304312 | 0.340012 | 0.363012 | 0.410903 | 0.422282 | 0.412186 | 0.377172 | 0.410211 | 0.350688 | 0.343765 | 0.306821 | 0.323139 | 0.328917 | 0.449775 | 0.383083 | 0.334547 | 0.000000 | 0.391275 | 0.396632 | 0.408994 | 0.487113 | 0.504891 |
| XXV    | Ticuna (Tarapaca) | 0.372962 | 0.361717 | 0.366810 | 0.411627 | 0.354442 | 0.343913 | 0.350277 | 0.319591 | 0.350506 | 0.375809 | 0.418425 | 0.428224 | 0.414616 | 0.387890 | 0.414400 | 0.364985 | 0.345567 | 0.311275 | 0.332527 | 0.341894 | 0.453453 | 0.396139 | 0.340346 | 0.391275 | 0.000000 | 0.349508 | 0.419809 | 0.495918 | 0.511123 |
| XXVI   | Ticuna (Arara)    | 0.375486 | 0.362794 | 0.366422 | 0.413295 | 0.351313 | 0.343041 | 0.354629 | 0.322626 | 0.355272 | 0.379440 | 0.419929 | 0.427312 | 0.419837 | 0.392572 | 0.419926 | 0.368143 | 0.356558 | 0.318874 | 0.335417 | 0.343111 | 0.465205 | 0.394599 | 0.348238 | 0.396632 | 0.349508 | 0.000000 | 0.432483 | 0.496135 | 0.515314 |
| XXVII  | Karitiana         | 0.387429 | 0.377724 | 0.380778 | 0.429771 | 0.370243 | 0.359888 | 0.370374 | 0.331653 | 0.372884 | 0.386069 | 0.431388 | 0.441104 | 0.433542 | 0.404396 | 0.432710 | 0.376516 | 0.372360 | 0.335672 | 0.354820 | 0.353114 | 0.474305 | 0.405379 | 0.360987 | 0.408994 | 0.419809 | 0.432483 | 0.000000 | 0.506816 | 0.530076 |
| XXVIII | Surui             | 0.449473 | 0.435561 | 0.438452 | 0.483965 | 0.432551 | 0.423803 | 0.435776 | 0.393129 | 0.438520 | 0.448703 | 0.497778 | 0.519001 | 0.497416 | 0.465948 | 0.506379 | 0.444677 | 0.437429 | 0.397055 | 0.412453 | 0.417608 | 0.550770 | 0.469253 | 0.424873 | 0.487113 | 0.495918 | 0.496135 | 0.506816 | 0.000000 | 0.607841 |
| XXIX   | Ache              | 0.463971 | 0.449299 | 0.454149 | 0.518751 | 0.449224 | 0.433963 | 0.456217 | 0.411142 | 0.451801 | 0.471200 | 0.516400 | 0.534395 | 0.520697 | 0.482561 | 0.521164 | 0.456491 | 0.448231 | 0.411499 | 0.435380 | 0.424928 | 0.559834 | 0.483333 | 0.437212 | 0.504891 | 0.511123 | 0.515314 | 0.530076 | 0.607841 | 0.000000 |
