# Supplementary material
Source: PubMed Central journal article supplement (PMC2098785)
Supplement: pgen.0030185.st031.pdf [file pgen.0030185.st031.pdf]

**Table S31.** Heterozygosity and  $F_{ST}$  ( $\times 100$ ) for various geographic regions, based on a reduced data set of 1306 individuals.

| <b>Geographic region</b> | <b>Number of populations</b> | <b>Heterozygosity (pooled)</b> | <b>Heterozygosity (average across populations)</b> | <b><math>F_{ST}</math> (<math>\times 100</math>)</b> |
|--------------------------|------------------------------|--------------------------------|----------------------------------------------------|------------------------------------------------------|
| Worldwide                | 78                           | 0.742 (0.072)                  | 0.688 (0.076)                                      | 6.1 (5.8, 6.3)                                       |
| Africa                   | 7                            | 0.775 (0.072)                  | 0.758 (0.073)                                      | 2.6 (2.4, 2.8)                                       |
| Europe                   | 8                            | 0.732 (0.075)                  | 0.728 (0.076)                                      | 0.8 (0.6, 0.9)                                       |
| Middle East              | 4                            | 0.740 (0.073)                  | 0.733 (0.072)                                      | 1.3 (1.2, 1.4)                                       |
| Central/South Asia       | 9                            | 0.738 (0.076)                  | 0.730 (0.076)                                      | 1.2 (1.1, 1.4)                                       |
| East Asia                | 19                           | 0.714 (0.098)                  | 0.705 (0.097)                                      | 1.3 (1.1, 1.4)                                       |
| Oceania                  | 2                            | 0.694 (0.120)                  | 0.674 (0.123)                                      | 5.6 (4.9, 6.3)                                       |
| America                  | 29                           | 0.677 (0.111)                  | 0.630 (0.105)                                      | 6.3 (6.1, 6.5)                                       |
| North America            | 3                            | 0.699 (0.100)                  | 0.688 (0.101)                                      | 2.5 (2.2, 2.9)                                       |
| Central America          | 8                            | 0.669 (0.119)                  | 0.641 (0.116)                                      | 4.6 (4.3, 4.9)                                       |
| Western South America    | 10                           | 0.675 (0.113)                  | 0.643 (0.110)                                      | 4.0 (3.7, 4.2)                                       |
| Eastern South America    | 8                            | 0.642 (0.131)                  | 0.582 (0.118)                                      | 12.6 (12.1, 13.1)                                    |

Heterozygosities are listed with standard deviations across loci. Pooled heterozygosity is significantly lower in Native Americans than in any of the other major geographic regions ( $P < 0.0001$  for each comparison, Wilcoxon signed rank test). For convenience, values of 100 times  $F_{ST}$  are shown in the table rather than  $F_{ST}$  values, and they are listed with 95% bootstrap confidence intervals across loci. The populations included in the various subdivisions of the Americas are listed in Table 2.
