# Supplementary material
Source: PubMed Central journal article supplement (PMC2098785)

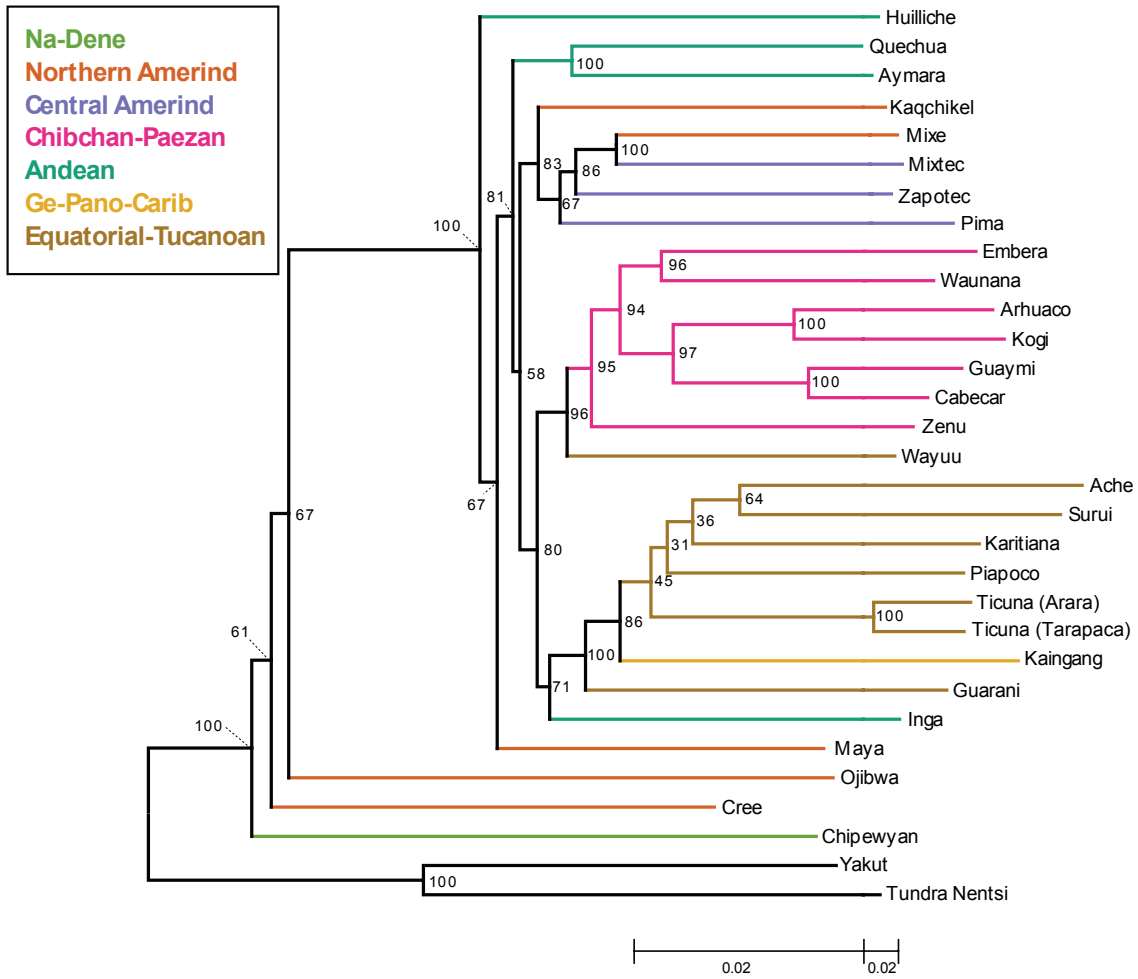

Figure S19

Supplement: pgen.0030185.sg019.pdf [file pgen.0030185.sg019.pdf]
